# Supplementary material
Source: PubMed Central journal article supplement (PMC7011201)
Supplement: DCi190014SupplementaryData.pdf [file DCi190014SupplementaryData.pdf]

## SUPPLEMENTARY DATA

### American Diabetes Association: **REVISED** PubMed Searches (*edits/additions are in red italics*)

**Baseline Criteria for All Searches Except for Topic Area #16**

(629 unique results across 16 topic areas – up from 497 unique results across 14 topic areas)

---

At least one of the following **subject headings** (*PubMed-assigned Major MeSH classification*) **Except for Topic Area #16: Plant-Based Protein and Kidney Disease**

- "Diabetes Mellitus" *Note: includes both Type 1 and Type 2*
- "Prediabetic State"

**AND**

At least one of the following terms in the **Title OR Abstract** field **Except for Topic Area #16: Plant-Based Protein and Kidney Disease**

- diabetes
- diabetic\*
- prediabetes
- "pre-diabetes"
- prediabetic\*
- "pre-diabetic"

**AND**

One of the following **publication types** (*PubMed-assigned classification*) **Except for Topic Area #16: Plant-Based Protein and Kidney Disease**

- Clinical Study
- Clinical Trial
- Randomized Controlled Trial
- Review
- Comparative Study
- Evaluation Studies
- Multicenter Study
- Twin Study
- Validation Studies
- **Meta-Analysis**

**AND**

At least one of the following terms in the **Title OR Abstract** field **Except for Topic Area #16: Plant-Based Protein and Kidney Disease**

- study
- studies
- trial
- trials
- review\*

**AND**

**Publication Date**

- 2013-present

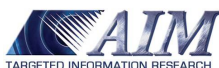

4300 W Sugnet Rd. · Midland, Michigan 48640-2790 · Phone 989-835-5811 · Fax 989-794-5011

## SUPPLEMENTARY DATA

### AND

**Species** (*PubMed-assigned classification*) **Except for Topic Area #16 Plant-Based Protein and Kidney Disease**

- Humans

### AND

**Language**

- English

### AND

**Ages** (*PubMed-assigned classification*) **Except for Topic Area #16: Plant-Based Protein and Kidney Disease**

- Adult (19+)

### NOT

**None** of the following terms in the **Title OR Abstract** field **Except for Topic Area #16: Plant-Based Protein and Kidney Disease**

- cancer
- gestational
- pregnan\*
- inpatient\*
- hospitaliz\*
- “acute care”
- “insulin pump” (*except for Topic Areas #13-14: Mealtime Insulin*)
- “cgm” (*except for Topic Areas #13-14: Mealtime Insulin*)
- “continuous glucose monitoring” (*except for Topic Areas #13-14: Mealtime Insulin*)
- “metabolic syndrome”
- “observational case”

## SUPPLEMENTARY DATA

### Topic Area #1: **Nutrition Therapy (106 results – no change)**

---

**Baseline criteria on p.1-2 (with “Meta-Analysis” publication type added)**

**AND**

**At least one of the following terms in the Title OR Abstract field**

- "nutrition therapy"
- "nutritional therapy"
- "nutrition counseling"
- "nutrition education"
- "medical nutrition"
- "mnt"
- "diet counseling"
- "healthy eating"
- "healthful eating"
- "eating plan"
- "meal planning"
- "portion control"
- "plate method"
- "carbohydrate counting"
- "calorie counting"
- "mindful eating"
- "intuitive eating"
- "dsme"
- "diabetes self-management education"
- "diabetes self management education"

### Topic Area #2: **Energy Balance (126 results – up from 123)**

---

**Baseline criteria on p.1-2 (with “Meta-Analysis” publication type added)**

**AND**

**At least one of the following terms in the Title OR Abstract field**

- "weight loss"
- "lose weight"
- "losing weight"
- "lost weight"

**AND**

**At least one of the following terms in the Title OR Abstract field**

- energy
- calori\*
- diet
- diets
- dieting
- nutrition\*



4300 W Sugnet Rd. · Midland, Michigan 48640-2790 · Phone 989-835-5811 · Fax 989-794-5011

## SUPPLEMENTARY DATA

### Topic Area #3: **Macronutrients (51 results – up from 49\*)**

---

**Baseline criteria on p.1-2 (with “Meta-Analysis” publication type added)**

**AND**

At least one of the following terms in the **Title OR Abstract** field

- macronutrient\*
- carbohydrate\* **AND** protein\* **AND** (fat OR fats)

*\*A broader test search for (macronutrient\* OR carbohydrate\* OR protein\* OR fat OR fats) yielded 837 results, so the existing “AND” operator was retained.*

### Topic Area #4: **Eating Patterns (84 results – up from 82)**

---

**Baseline criteria on p.1-2 (with “Meta-Analysis” publication type added)**

**AND**

At least one of the following terms in the **Title OR Abstract** field

- eating
- eat
- eats
- dietary
- diet
- diets
- nutrition\*

**AND**

At least one of the following terms in the **Title OR Abstract** field

- Mediterranean\*
- “dash”
- “low fat”
- “low-fat”
- “low carbohydrate”
- “low-carbohydrate”
- “moderate carbohydrate”
- carbohydrate\* **AND** (count OR counting)
- ketogenic
- “intermittent fasting”
- “paleo”
- vegan\*
- vegetarian\*
- flexitarian
- “plant-based”
- “plant based”
- “plate method”



## SUPPLEMENTARY DATA

### Topic Area #5: **Carbohydrates (155 results – up from 146)**

---

**Baseline criteria on p.1-2 (with “Meta-Analysis” publication type added)**

**AND**

At least one of the following terms in the **Title OR Abstract** field

- carbohydrate\*
- starch\*
- fiber\*
- grain\*
- fructose
- sucrose
- **“whole-grain”**

**AND**

At least one of the following terms in the **Title OR Abstract** field

- \*glycemi\*
- glucose\*
- **\*glycaemi\***
- *Note: The “GI” and “GL” acronyms were not added to the search since they sometimes refer to gastrointestinal (GI), glucose intolerance (GI), glargine (GL), glucose-lowering (GL) or gongronema latifolium.*

### Topic Area #6: **Protein (60 results – up from 55 results)**

---

**Baseline criteria on p.1-2 (with “Meta-Analysis” publication type added)**

**AND**

**Protein in the Title OR Abstract field**

**AND**

At least one of the following terms in the **Title OR Abstract** field

- dietary
- diet
- nutrition
- nutritional
- “plant-based”
- “plant based”
- “animal-based”
- “animal based”

**AND**

At least one of the following terms in the **Title OR Abstract** field

- \*glycemi\*
- **\*glycaemi\***
- glucose\*

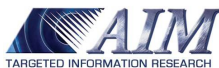

4300 W Sugnet Rd. · Midland, Michigan 48640-2790 · Phone 989-835-5811 · Fax 989-794-5011

Topic Area #7: **Fat (42 results – up from 40 results)**

---

**Baseline criteria on p.1-2 (with “Meta-Analysis” publication type added)**

**AND**

At least one of the following terms in the **Title OR Abstract** field

- fat
- fatty
- fats

**AND**

At least one of the following terms in the **Title OR Abstract** field

- dietary
- nutrition
- diet
- nutritional

**AND**

At least one of the following terms in the **Title OR Abstract** field

- MUFA\*
- PUFA\*
- monounsaturated
- polyunsaturated
- unsaturated\*
- saturated
- “trans”
- interesterifi\*
- “omega-3”
- “epa”
- “dha”
- “ala”
- “fish”

**AND**

At least one of the following terms in the **Title OR Abstract** field

- \*glycemi\*
- **\*glycaemi\***
- glucose\*
- cardiovascular
- cholesterol

## SUPPLEMENTARY DATA

### Topic Area #8: **Supplements (21 results – up from 17 results)**

---

**Baseline criteria on p.1-2 (with “Meta-Analysis” publication type added)**

#### **AND**

At least one of the following terms in the **Title OR Abstract** field

- supplement
- supplementations
- supplements

#### **AND**

At least one of the following terms in the **Title OR Abstract** field

- dietary
- diet
- nutrition
- nutritional

#### **AND**

At least one of the following terms in the **Title OR Abstract** field

- micronutrient\*
- vitamin\*
- mineral\*
- \*oxidant\*
- Herbs
- Herb
- Herbal
- Spice
- Spices
- Cinnamon
- Chromium
- Carotene
- Magnesium
- Zinc
- Copper
- Manganese
- Vanadium
- Thiamin
- Pyridoxine
- **Botanical\***
- **Phytonutrient\***
- **Phytochemical\***
- **Selenium**
- **Leucine**
- **“Amino acid”**
- **“Amino acids”**
- **Anthocyanin\***

#### **AND**

~~At least one of the following terms in the **Title OR Abstract** field~~

- ~~• **\*glycemi\***~~
- ~~• **glucose\***~~
- ~~• **cardiovascular**~~
- **cholesterol**

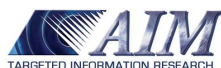

SUPPLEMENTARY DATA

Topic Area #9: **Alcohol (15 results – up from 10 results)**

---

**Baseline criteria on p.1-2 (with “Meta-Analysis” publication type added)**

**AND**

At least one of the following terms in the **Title OR Abstract** field

- alcohol\*
- *ethanol*

**AND**

At least one of the following terms in the **Title OR Abstract** field

- drink\*
- consum\*

**AND**

At least one of the following terms in the **Title OR Abstract** field

- \*glycemi\*
- *\*glycaemi\**
- insulin

Topic Area #10: **Sodium (16 results – no change)**

---

**Baseline criteria on p.1-2 (with “Meta-Analysis” publication type added)**

**AND**

At least one of the following terms in the **Title OR Abstract** field

- sodium
- salt\*

**AND**

At least one of the following terms in the **Title OR Abstract** field

- eat
- eats
- eating
- consum\*
- dietary
- diet
- nutrition\*

**AND**

At least one of the following terms in the **Title OR Abstract** field

- hypertensi\*
- “blood pressure”





SUPPLEMENTARY DATA

**Topic Area #11: Nonnutritive Sweeteners/NNS (7 results – no change)**

---

**Baseline criteria on p.1-2 (with “Meta-Analysis” publication type added)**

**AND**

**At least one of the following terms in the Title OR Abstract field**

- “nonnutritive sweetener”
- nonnutritive sweeteners”
- “non-nutritive sweetener”
- “non-nutritive sweeteners”
- NNS\*
- “artificial sweetener”
- “artificial sweeteners”
- “artificially sweetened”
- “sugar substitute”
- “sugar substitutes”
- (hypocalori\* OR “non-caloric”) AND sweet\*

**Topic Area #12: Gastroparesis (10 results – no change)**

---

**Baseline criteria on p.1-2 (with “Meta-Analysis” publication type added)**

**AND**

**At least one of the following terms in the Title OR Abstract field**

- dietary
- diet
- nutrition\*

**AND**

**At least one of the following terms in the Title OR Abstract field**

- gastroparesis
- gastropathy
- “gastric emptying
- “delayed emptying”



SUPPLEMENTARY DATA

Topic Area #13: **Mealtime Insulin search 1 of 2 (30 results - up from 15 results)**

---

**Baseline criteria on p.1-2 (with “Meta-Analysis” publication type added; no exclusion of CGM or insulin pump terms in the title/abstract fields)**

**AND**

**Insulin in the Title OR Abstract field**

**AND**

**At least one of the following terms in the Title OR Abstract field**

- dosage\*
- dosing
- dose\*
- **“insulin pump”**
- **“insulin pumps”**
- **“CGM”**
- **“continuous glucose”**
- **“MDI”**
- **“multiple daily injections”**
- **“multiple daily injection”**

**AND**

**At least one of the following terms in the Title OR Abstract field**

- Meal
- Meals
- Mealtime
- **Bolus**
- **Premeal\***
- **“Pre-meal”**
- **“Pre-meals”**

**AND**

**At least one of the following terms in the Title OR Abstract field**

- Eat
- Eats
- Eating
- Consum\*
- dietary
- nutrition\*
- protein
- proteins
- fat
- fats

SUPPLEMENTARY DATA

**Topic Area #14 (NEW): Mealtime Insulin search 2 of 2 (125 results)**

**Baseline criteria on p.1-2 (with “Meta-Analysis” publication type added; no exclusion of CGM or insulin pump terms in the title/abstract fields)**

**AND**

**Insulin in the Title OR Abstract field**

**AND**

**At least one of the following terms in the Title OR Abstract field**

- dosage\*
- dosing
- dose\*
- **“insulin pump”**
- **“insulin pumps”**
- **“CGM”**
- **“continuous glucose”**
- **“MDI”**
- **“multiple daily injections”**
- **“multiple daily injection”**

**AND**

**At least one of the following terms in the Title OR Abstract field**

- Meal
- Meals
- Mealtime
- **Bolus**
- **Premeal\***
- **“Pre-meal”**
- **“Pre-meals”**

**AND**

**At least one of the following terms in the Title OR Abstract field**

- ~~Eat~~
- ~~Eats~~
- ~~Eating~~
- ~~Consum\*~~
- ~~dietary~~
- ~~nutrition\*~~
- ~~protein~~
- ~~proteins~~
- ~~fat~~
- ~~fats~~



## SUPPLEMENTARY DATA

### **Topic Area #15: *Genetics/Personalized Nutrition/Microbiome (22 results – up from 17 results)***

---

**Baseline criteria on p.1-2 (with “Meta-Analysis” publication type added)**

**AND**

At least one of the following terms in the **Title OR Abstract** field

- nutrition\*
- dietary

**AND**

At least one of the following terms in the **Title OR Abstract** field

- Microbiome\*
- Genetic\*
- Personaliz\*
- **Genomic\***
- **Proteomic\***
- **Metabolomic\***

### **Topic Area #16: *Plant-Based Protein and Kidney Disease (9 results)***

---

At least one of the following terms in the **Title OR Abstract** field

- “plant-based”
- “plant based”

**AND**

At least one of the following terms in the **Title OR Abstract** field

- protein
- proteins

**AND**

At least one of the following terms in the **Title OR Abstract** field

- “kidney disease”
- “kidney diseases”
- “CKD”

**AND**

**Publication Date**

- 2013-present

**AND**

**Language**

- English



4300 W Sugnet Rd. · Midland, Michigan 48640-2790 · Phone 989-835-5811 · Fax 989-794-5011
